# Supplementary material
Source: publisher figshare collection journal article supplement (https://karger.figshare.com/articles/dataset/_/7466873)

Modified Tsukuba Scoring Method

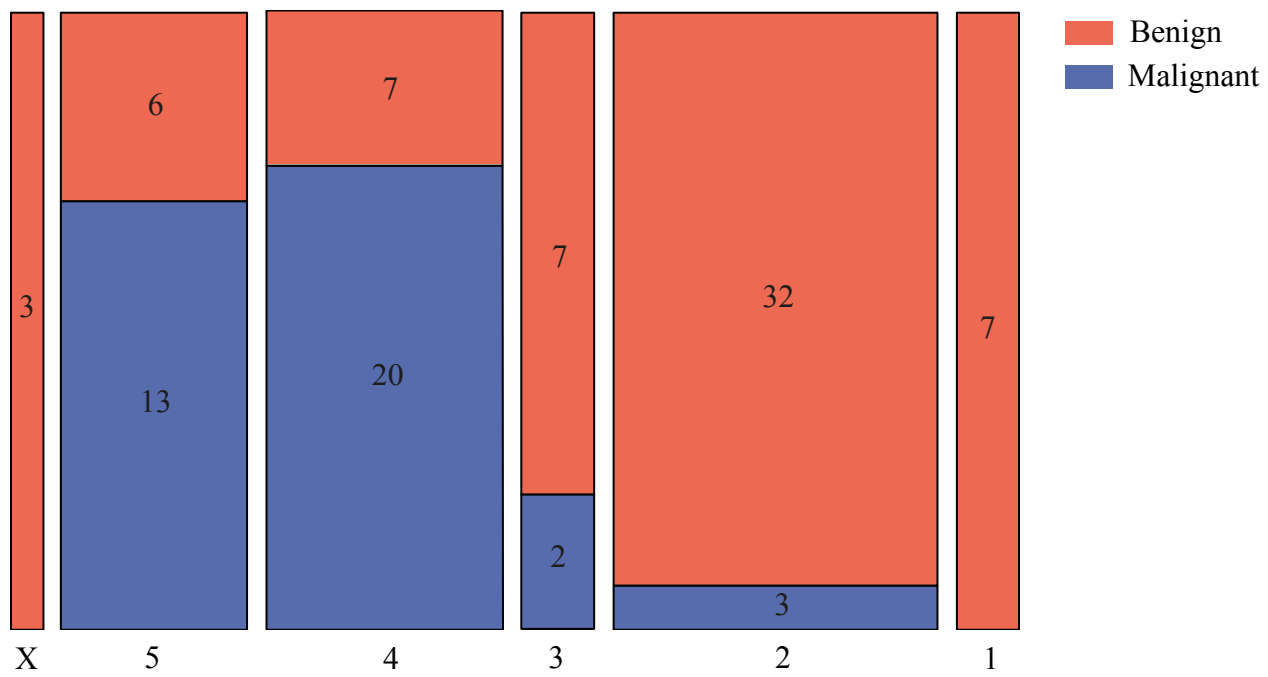

Supplement: Supplementary file 1 [file 1]

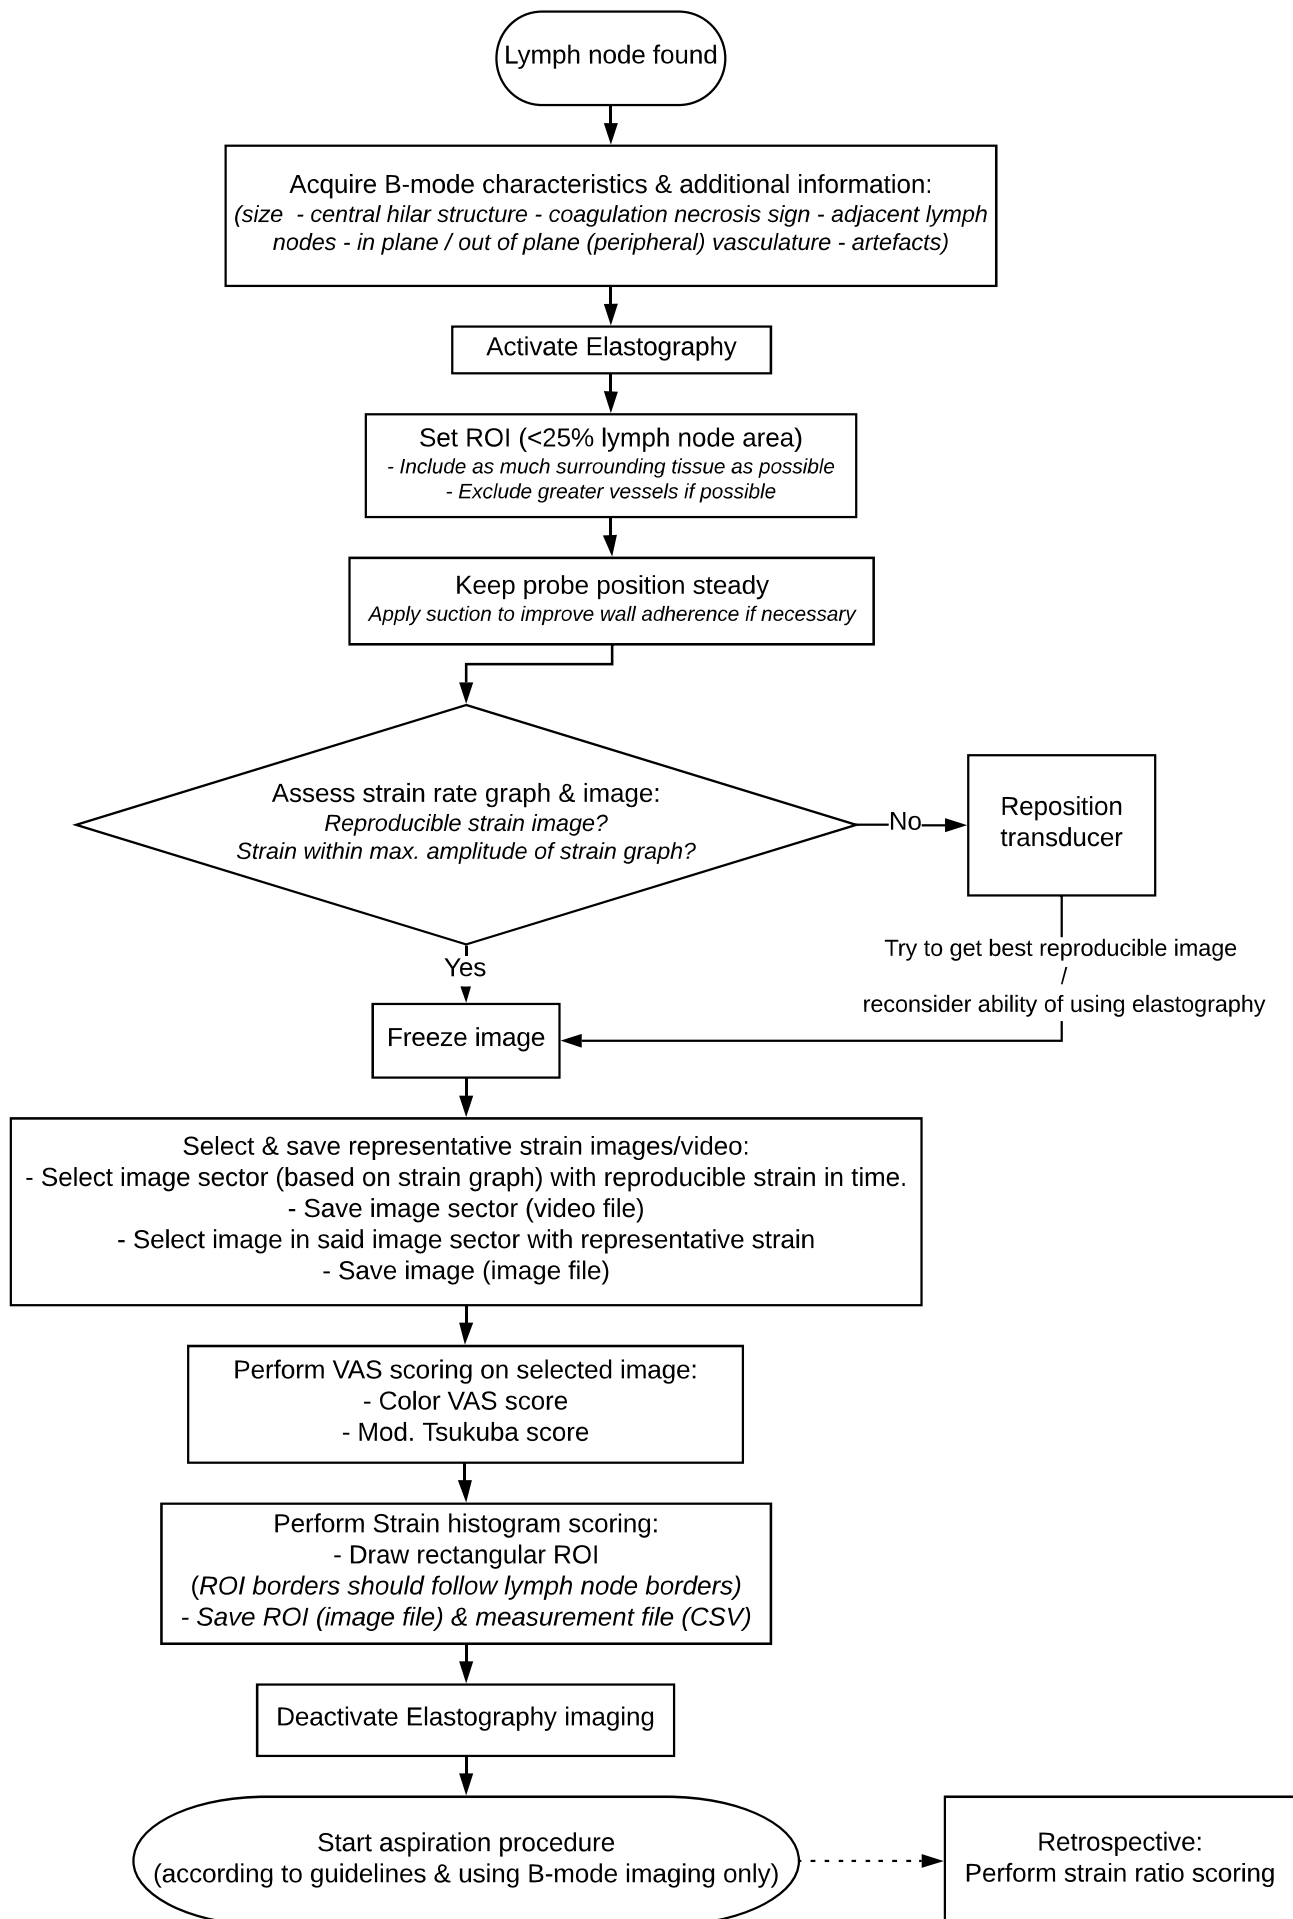

Supplement: Supplementary file 2 [file 1]

Color Visual Analogue Scale Scoring Method

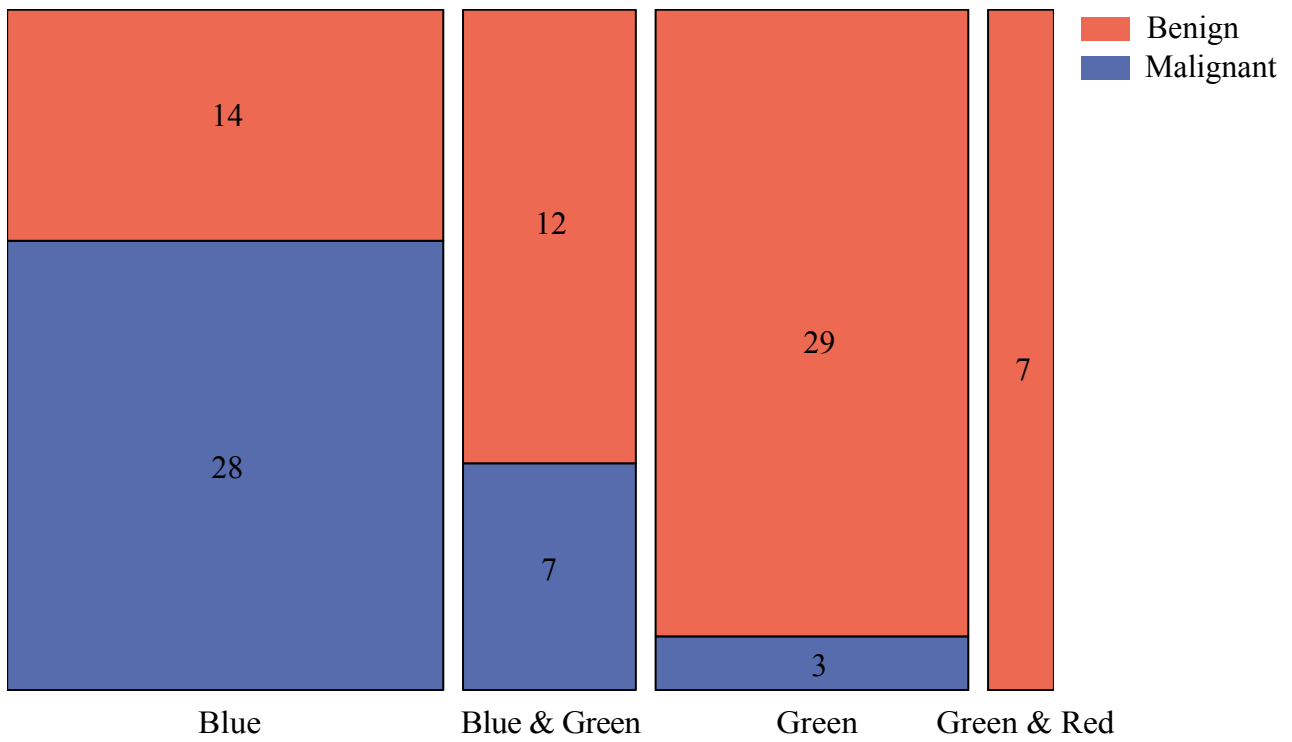

Color Visual Analogue Scale Scoring Method

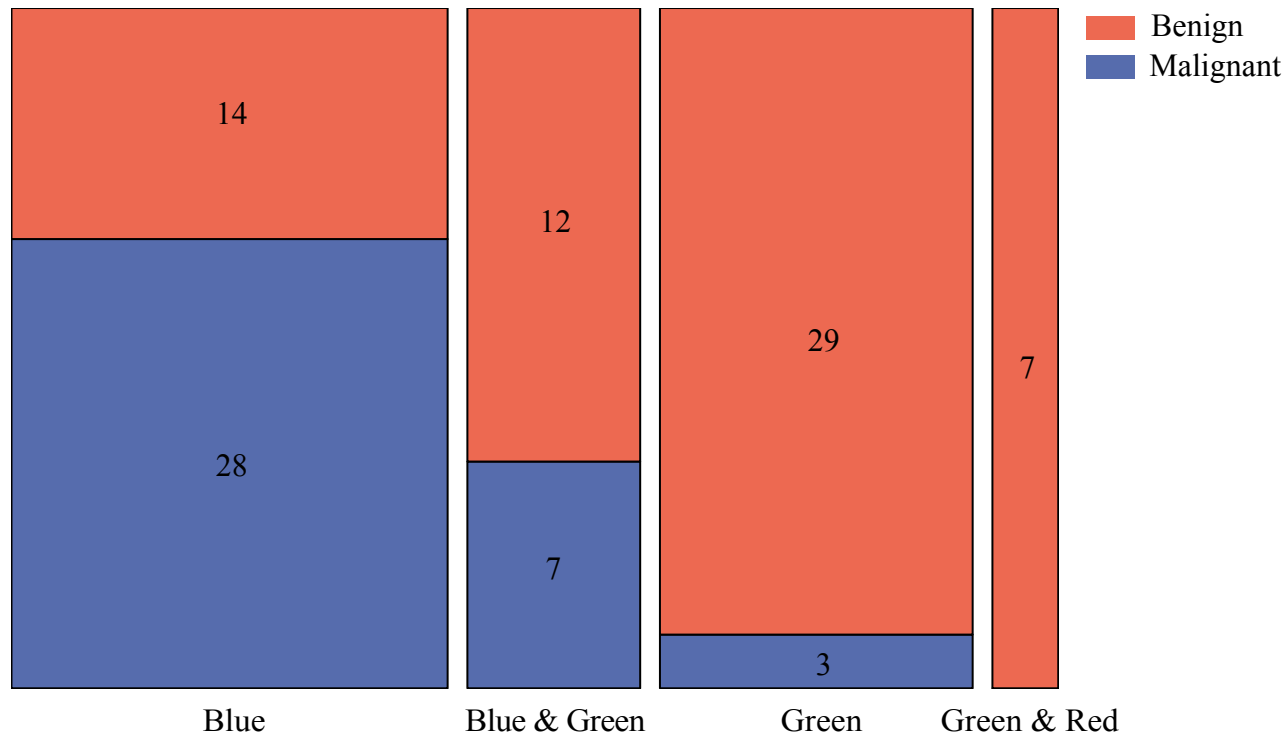

Supplement: Supplementary file 4 [file 1]

**ROC Curve of Strain Histogram Mean & Strain Ratio Scoring Method**

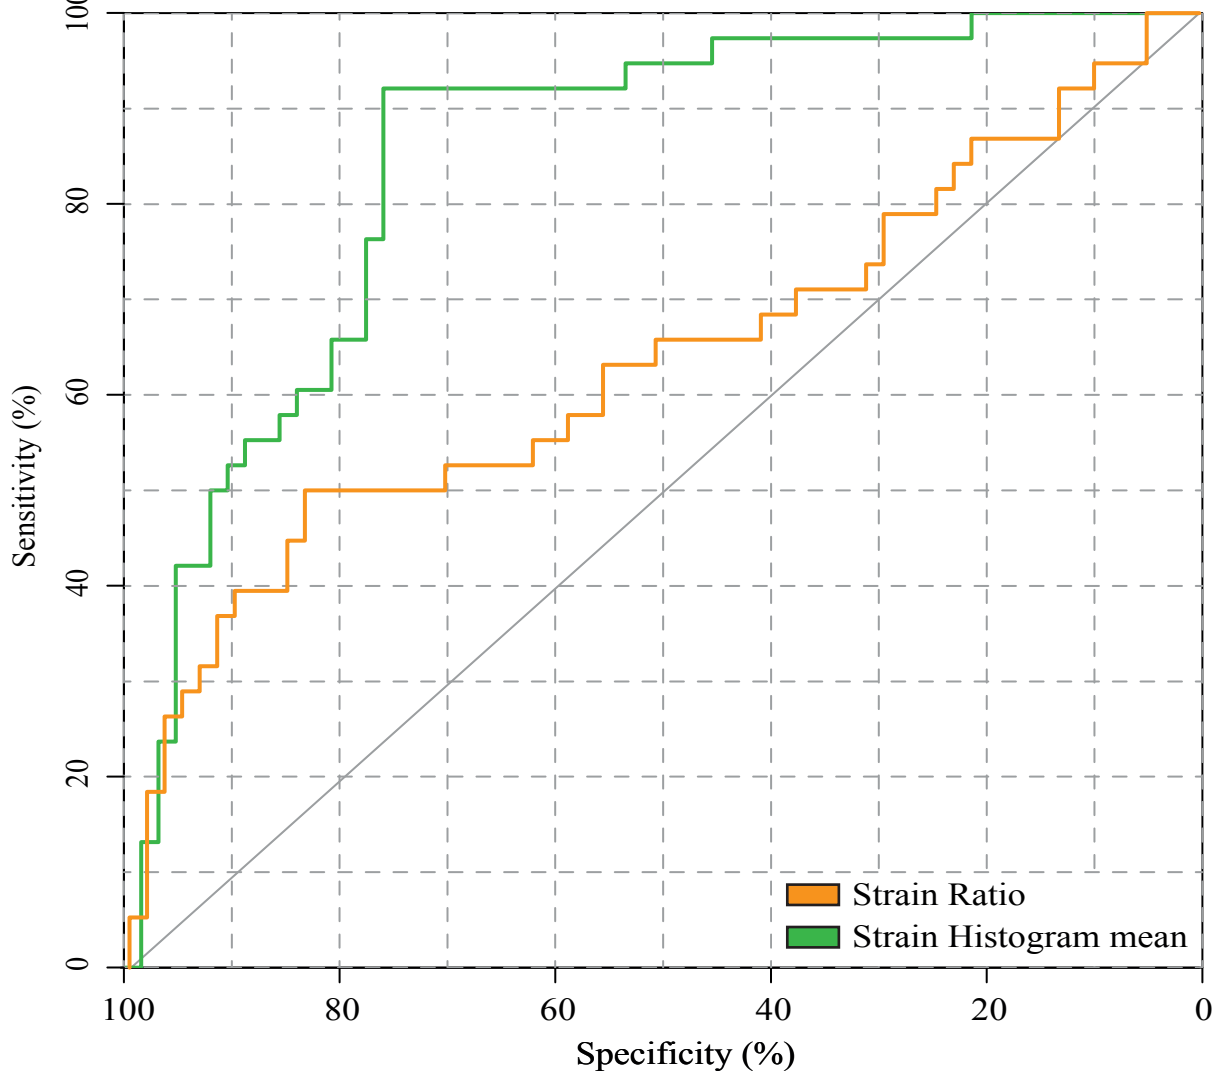

Supplement: Supplementary file 5 [file 1]
